# Supplementary material for: The role of selection and evolution in changing parturition date in a red deer population
Source: PubMed Central journal article supplement (PMC6830748; doi:10.1371/journal.pbio.3000493), 2019-11-05
Supplement: pbio.3000493.s001.pdf [file pbio.3000493.s001.pdf]

## S1 Back-transformations to estimate change in days

Our analyses were all run on transformed values  $z = 100\log(B)$ , where  $B$  is the parturition date in number of days after May 1st. We used a linear regression of  $z$  on offspring birth year to predict the initial mean  $z$  ( $\bar{z}_0$ ) in 1972 (assuming a linear change) and extracted the residual variance of that regression ( $\sigma^2(\epsilon)$ ). Assuming that the residuals from this regression are normally distributed and their variance constant,  $B$  follows a log-normal distribution conditional on time. The mean of a log-normal distribution is  $\exp(\mu + \frac{\sigma^2}{2})$  where  $\mu$  and  $\sigma^2$  are the mean and variance on the log-scale. Therefore we predicted the change in mean parturition dates across the whole study period as  $\Delta\bar{B} = \exp\left(\frac{\bar{z}_t}{100} + \frac{\sigma^2(\epsilon)/10000}{2}\right) - \exp\left(\frac{\bar{z}_0}{100} + \frac{\sigma^2(\epsilon)/10000}{2}\right)$ , where  $\bar{z}_t$  is the model prediction of  $\bar{z}$  (on the log-scale) at the end of the study period (year 2016). This back-transformation is imperfect because the relationship between  $z$  and years is not perfectly linear, but it approximately recovers the observed phenotypic change (non-transformed data: he estimate of change using raw means of non-transformed data was  $-12.32$  days 95%CI  $[-14.53; -10.10]$  whereas that calculated from the back-transformed method described above was  $-12.11$  days 95%CI  $[-13.77; -10.35]$ ).
