# Supplementary material for: The role of selection and evolution in changing parturition date in a red deer population
Source: PubMed Central journal article supplement (PMC6830748; doi:10.1371/journal.pbio.3000493), 2019-11-05
Supplement: pbio.3000493.s005.pdf [file pbio.3000493.s005.pdf]

## S8 Analyses of untransformed parturition date data

We re-fitted the univariate animal model (equation 1) to the raw (i.e. untransformed) data of parturition date and re-estimated heritability and the rate of evolution based on the BLUP regression. Heritability was estimated at 0.10 (95%CI [0.06; 0.13]). The change in breeding values was estimated at  $-1.7$  (95% CI[-4.0; 0.7]) using the most conservative method, and  $-2.3$  days (95%CI [-5.7; 0.4]) using the less conservative method. Thus all estimates coincide with those from the analyses of the log-transformed data, but the models using untransformed data performed relatively poorly (skewed non-Gaussian residuals and poor MCMC mixing) which may impair the reliability of estimates.
