# Supplementary material for: The role of selection and evolution in changing parturition date in a red deer population
Source: PubMed Central journal article supplement (PMC6830748; doi:10.1371/journal.pbio.3000493), 2019-11-05

# Posterior distribution for selection

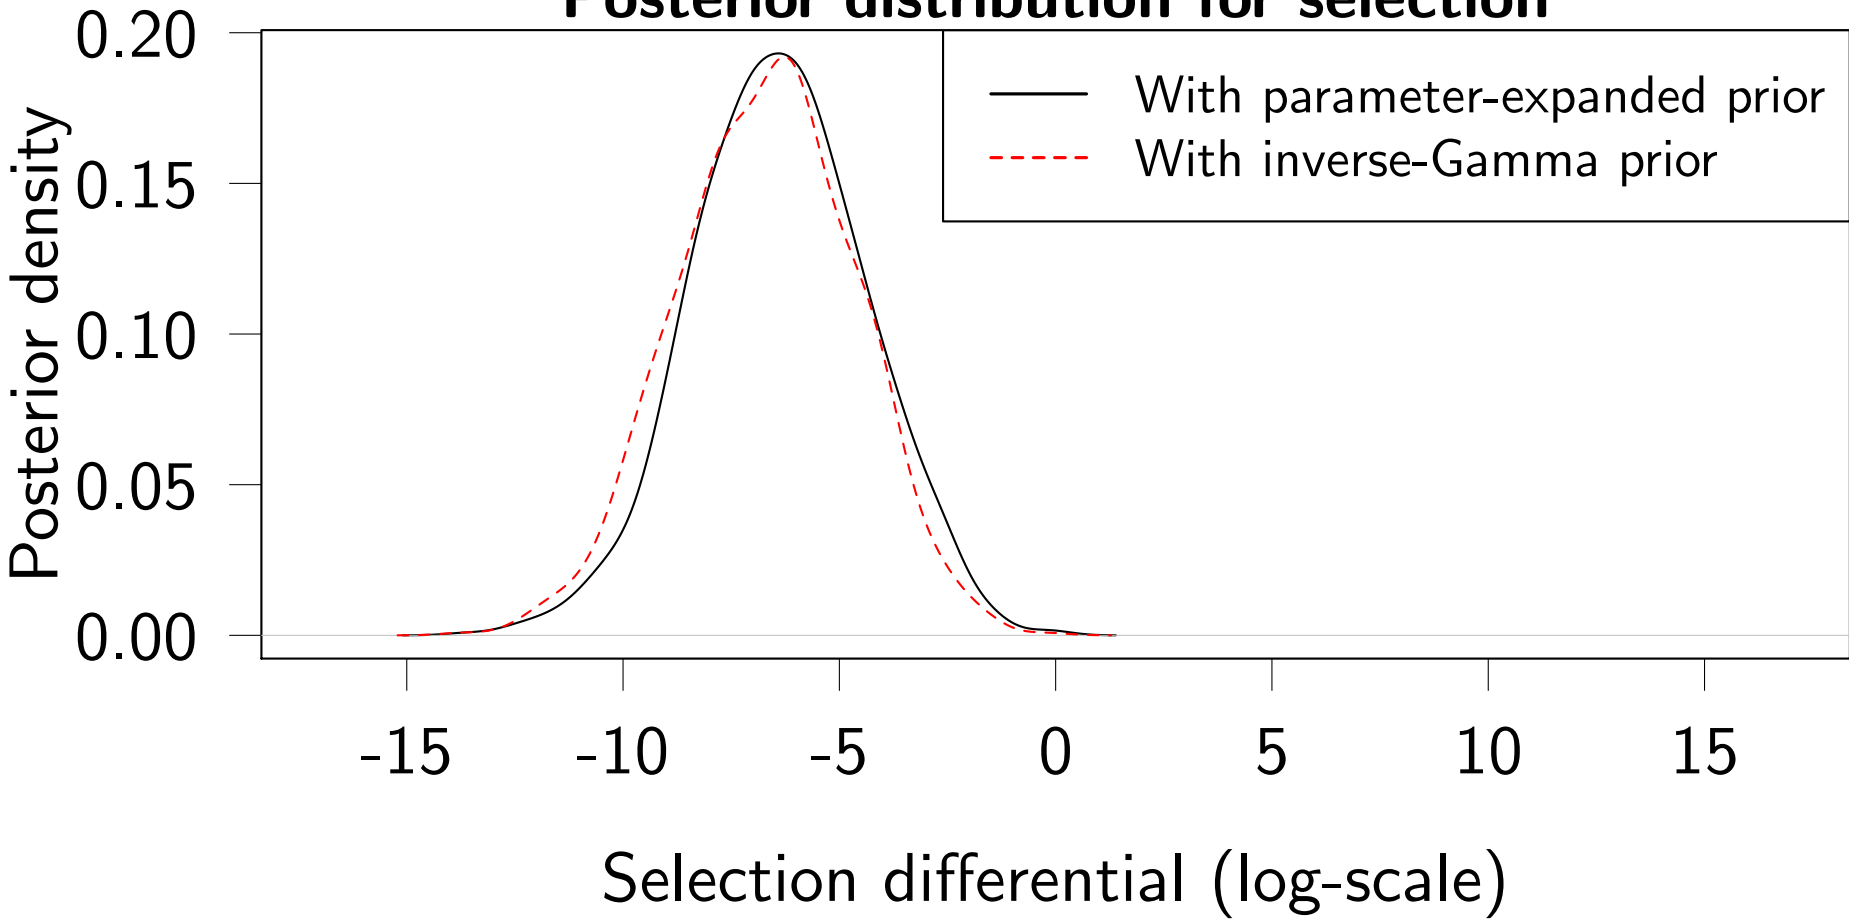

Supplement: pbio.3000493.s006.pdf [file pbio.3000493.s006.pdf]
