# Supplementary material for: The role of selection and evolution in changing parturition date in a red deer population
Source: PubMed Central journal article supplement (PMC6830748; doi:10.1371/journal.pbio.3000493), 2019-11-05
Supplement: pbio.3000493.s008.pdf [file pbio.3000493.s008.pdf]

## S1 Table Univariate animal model

|                                     | Estimate | 95% CI            |
|-------------------------------------|----------|-------------------|
| Intercept*                          | 406.82   | [390.79 ; 420.52] |
| Female's inbreeding coefficient     | 89.39    | [-7.22 ; 196.58]  |
| Offspring Sex: Male                 | 1.09     | [-1.05 ; 3.20]    |
| Female's Reproductive Status:       |          |                   |
| Naive                               | -13.53   | [-19.26 ; -7.65]  |
| Summer Yeld                         | -27.01   | [-31.46 ; -22.00] |
| True Yeld                           | -21.56   | [-25.43 ; -17.82] |
| Winter Yeld                         | -0.60    | [-6.19 ; 4.19]    |
| Female's age                        | -6.64    | [-9.20 ; -3.76]   |
| Female's age squared                | 0.38     | [0.24 ; 0.51]     |
| Genetic group: Proportion immigrant | 4.38     | [-6.97 ; 16.48]   |
| Temperature                         | -3.72    | [-8.13 ; 1.50]    |
| Calf birth year (covariate)         | -0.45    | [-0.74 ; -0.13]   |

Notes: \*The intercept is defined for the year 1972.

|                       | Estimate | 95% CI           |
|-----------------------|----------|------------------|
| Additive genetic      | 208.3    | [140.8 ; 282.9]  |
| Permanent environment | 5.9      | [0 ; 40.6]       |
| Focal female's mother | 1.9      | [0 ; 10.5]       |
| Offspring birth year  | 112.3    | [59.0 ; 189.1]   |
| Female cohort         | 1.9      | [0.0 ; 9.7]      |
| Residuals             | 963.9    | [912.7 ; 1011.0] |
