# Supplementary material for: The role of selection and evolution in changing parturition date in a red deer population
Source: PubMed Central journal article supplement (PMC6830748; doi:10.1371/journal.pbio.3000493), 2019-11-05
Supplement: pbio.3000493.s009.pdf [file pbio.3000493.s009.pdf]

## S2 Table Phenotypic selection model

| Random effect                | Parameter            | estimate      | 95%CI                   |
|------------------------------|----------------------|---------------|-------------------------|
| Female cohort                | Variance Parturition | 12.395        | [0 ; 42.39]             |
|                              | Covariance           | 1.133         | [-15.47 ; 17.2]         |
|                              | Variance LBS         | 9.080         | [5.26 ; 12.93]          |
| Focal female's mother        | Variance Parturition | 29.985        | [0 ; 69.99]             |
|                              | Covariance           | -0.031        | [-0.55 ; 0.34]          |
|                              | Variance LBS         | 0.006         | [0 ; 0.02]              |
| Offspring birth year         | Variance Parturition | 157.481       | [89.12 ; 250.5]         |
| <b>Permanent environment</b> | Variance Parturition | 219.364       | [150.26 ; 290.62]       |
|                              | <b>Covariance</b>    | <b>-6.397</b> | <b>[-10.09 ; -2.44]</b> |
|                              | Variance LBS         | 0.987         | [0.84 ; 1.13]           |
| Residual                     | Variance Parturition | 957.034       | [909.11 ; 1006.62]      |

| Trait                                             | Parameter                           | estimate | 95%CI             |
|---------------------------------------------------|-------------------------------------|----------|-------------------|
| LBS (Poisson)                                     | Intercept                           | -1.560   | [-1.71 ; -1.4]    |
|                                                   | Intercept                           | 397.555  | [384.91 ; 409.66] |
| Log-transformed<br>Parturition date<br>(Gaussian) | Offspring sex                       | 1.824    | [0.17 ; 3.75]     |
|                                                   | Female's Reproductive Status: Naive | -16.811  | [-21.11 ; -11.33] |
|                                                   | Summer Yeld                         | -27.313  | [-30.91 ; -23.37] |
|                                                   | True Yeld                           | -23.434  | [-26.79 ; -20.5]  |
|                                                   | Winter Yeld                         | -0.803   | [-5.18 ; 3.86]    |
|                                                   | Female's age                        | -7.389   | [-9.69 ; -5.43]   |
|                                                   | Female's age squared                | 0.450    | [0.35 ; 0.56]     |
