# Supplementary material for: The role of selection and evolution in changing parturition date in a red deer population
Source: PubMed Central journal article supplement (PMC6830748; doi:10.1371/journal.pbio.3000493), 2019-11-05
Supplement: pbio.3000493.s010.pdf [file pbio.3000493.s010.pdf]

### S3 Table Bivariate animal model

| Random effect           | Parameter            | estimate      | 95%CI                  |
|-------------------------|----------------------|---------------|------------------------|
| <b>Additive genetic</b> | Variance Parturition | 211.257       | [136.97 ; 284.08]      |
|                         | <b>Covariance</b>    | <b>-4.937</b> | <b>[-9.56 ; -0.58]</b> |
|                         | Variance LBS         | 1.077         | [0.75 ; 1.4]           |
| Female cohort           | Variance Parturition | 6.951         | [0 ; 26.62]            |
|                         | Covariance           | -1.548        | [-12.08 ; 6.65]        |
|                         | Variance LBS         | 6.312         | [3.54 ; 9.15]          |
| Focal female's mother   | Variance Parturition | 26.383        | [0 ; 71.51]            |
|                         | Covariance           | -0.016        | [-0.71 ; 0.65]         |
|                         | Variance LBS         | 0.020         | [0 ; 0.08]             |
| Offspring birth year    | Variance Parturition | 97.916        | [43.81 ; 150.51]       |
| Permanent environment   | Variance Parturition | 11.895        | [0.17 ; 50.19]         |
|                         | Covariance           | -3.935        | [-11.64 ; 1.56]        |
|                         | Variance LBS         | 3.587         | [3.16 ; 4.03]          |
| Residual                | Variance Parturition | 962.298       | [915.22 ; 1016.81]     |

| Trait                                             | Parameter                           | estimate        | 95%CI              |
|---------------------------------------------------|-------------------------------------|-----------------|--------------------|
| LBS (Poisson)                                     | Intercept                           | -2.204          | [-2.92 ; -1.46]    |
|                                                   | Genetic group                       | 2.015           | [1.56 ; 2.47]      |
|                                                   | Inbreeding                          | -17.693         | [-23.33 ; -11.88]  |
| Log-transformed<br>Parturition date<br>(Gaussian) | Intercept                           | 1149.012        | [434.91 ; 1877.48] |
|                                                   | Genetic group                       | -2.046          | [-11.09 ; 8.87]    |
|                                                   | Inbreeding                          | 59.318          | [-34.12 ; 154.82]  |
|                                                   | Female's Reproductive Status: Naive | -15.016         | [-20.37 ; -9.43]   |
|                                                   | Summer Yeld                         | -26.373         | [-31.75 ; -21.46]  |
|                                                   | True Yeld                           | -21.861         | [-26.42 ; -16.97]  |
|                                                   | Milk                                | 0.563           | [-4.03 ; 5.19]     |
|                                                   | Female's age                        | -7.223          | [-9.23 ; -4.91]    |
|                                                   | Female's age squared                | 0.431           | [0.32 ; 0.53]      |
| Offspring birth year                              | -0.372                              | [-0.74 ; -0.01] |                    |
